# Supplementary material
Source: Springer Nature journal article supplement (https://www.springermedizin.de/resource/supplementary/12889_2006_689_MOESM4_ESM.pdf/9502316)

(a)

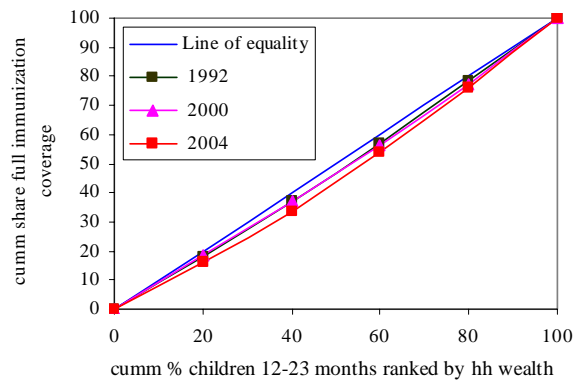

(b)

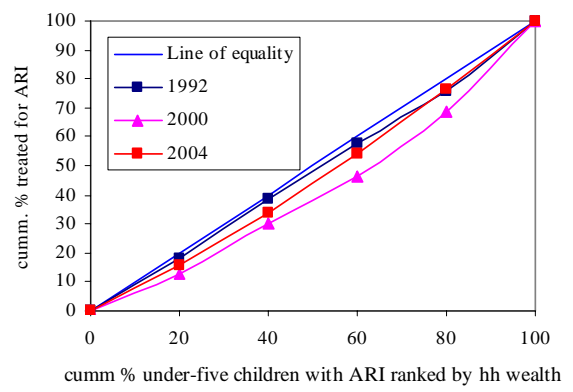

(c)

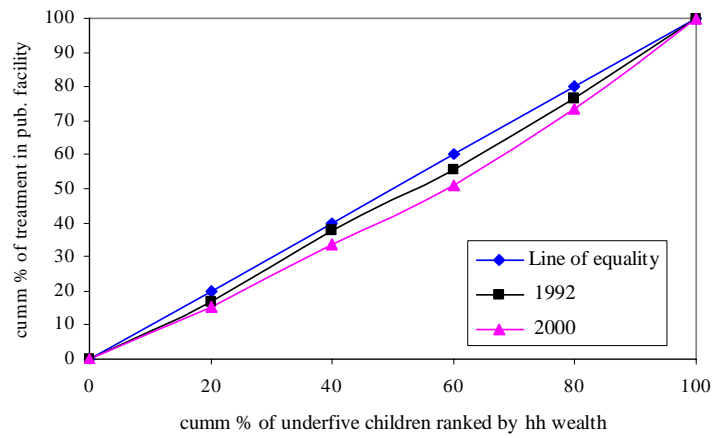

Supplement: MOESM4 [file 9502316]
